# Supplementary material for: Predictive Value of Olfactory and Taste Symptoms in the Diagnosis of COVID-19: A Systematic Review and Meta-Analysis
Source: PubMed Central journal article supplement — Clin Exp Otorhinolaryngol. 2021 Jan 25;14(3):312–20. doi: 10.21053/ceo.2020.02369 (PMC8373831; doi:10.21053/ceo.2020.02369), 2021-01-25
Supplement: ceo-2020-02369-suppl1.pdf [file ceo-2020-02369-suppl1.pdf]

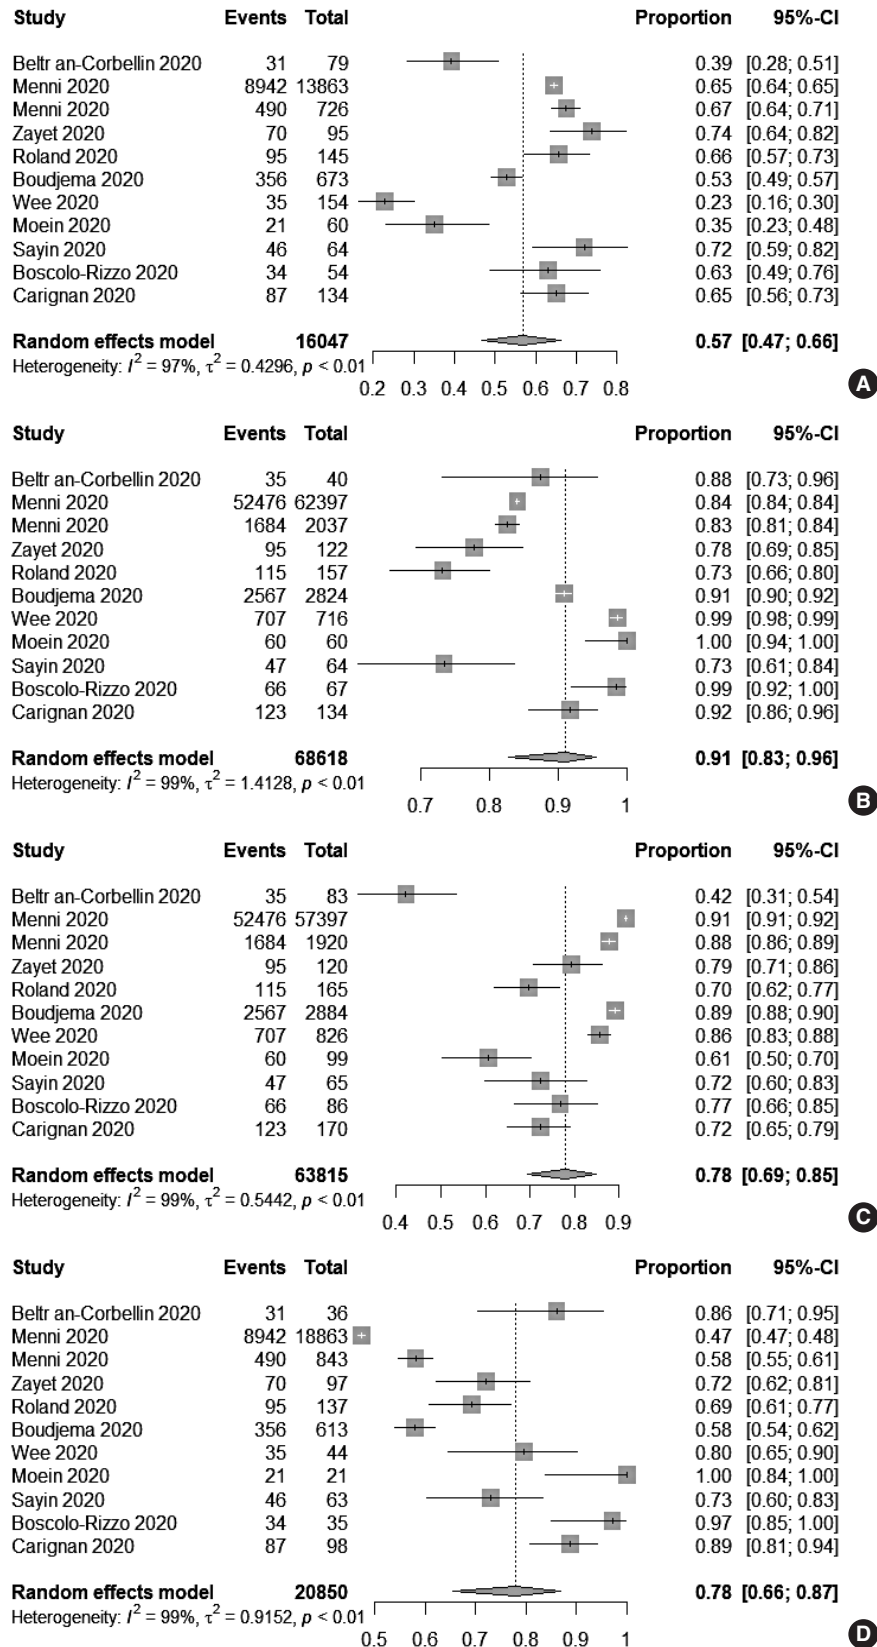

Supplementary Fig. 1. Forest plots of the sensitivity (A), specificity (B), negative predictive values (C), and positive predictive values (D) of the olfactory and/or taste disorder studies. CI, confidence interval.
