# Supplementary material for: Predictive Value of Olfactory and Taste Symptoms in the Diagnosis of COVID-19: A Systematic Review and Meta-Analysis
Source: PubMed Central journal article supplement — Clin Exp Otorhinolaryngol. 2021 Jan 25;14(3):312–20. doi: 10.21053/ceo.2020.02369 (PMC8373831; doi:10.21053/ceo.2020.02369), 2021-01-25
Supplement: ceo-2020-02369-suppl4.pdf [file ceo-2020-02369-suppl4.pdf]

Supplementary Table 2. Study characteristics

| Study                         | Study design            | Total no. | Male:female (case/control) | Age (case/control, yr) <sup>a)</sup> | Nation      | Number (COVID-19-positive/control)          | Assessment tool                           | Assessed symptom            |
|-------------------------------|-------------------------|-----------|----------------------------|--------------------------------------|-------------|---------------------------------------------|-------------------------------------------|-----------------------------|
| Beltran-Corbellin (2020) [10] | Case-control            | 119       | 48:29/<br>Not defined      | 61.6 (17.4)/61.1 (17.1)              | Spain       | 79/40 influenza                             | Brief questionnaire                       | Smell and/or taste disorder |
| Hornuss (2020) [16]           | Cohort                  | 90        | Not defined                | 56 ± 16.9/54 ± 18.3                  | Germany     | 45/45 heterogenous (healthy, ill, etc.)     | Burghart Sniffin' sticks                  | Smell and/or taste disorder |
| Menni (2020) [9]              | Cross-sectional         | 76,260    | Not defined                | Not defined                          | UK          | 13,863/62,397 COVID-19-negative             | Self-reported symptom data                | Smell and/or taste disorder |
| Zayet (2020) [2]              | Prospective             | 217       | 32:185                     | 39.8 (18–73)                         | France      | 95/122 COVID-19-negative                    | Self-reported symptom data                | Smell and/or taste disorder |
| Zayet (2020) [2]              | Prospective             | 217       | 32:185                     | 39.8(18–73)                          | France      | 95/122 COVID-19-negative                    | Self-reported symptom data                | General symptom             |
| Benezit (2020) [6]            | Cross-sectional         | 257       | Not defined                | Not defined                          | France      | 68/189 heterogenous (random persons)        | Self-reported symptom data                | Smell and/or taste disorder |
| Tostmann (2020) [21]          | Cohort                  | 269       | Not defined                | Not defined                          | Netherlands | 79/190 COVID-19-negative                    | Online anonymous questionnaire            | Smell and/or taste disorder |
| Tostmann (2020) [21]          | Cohort                  | 803       | 141:661                    | Not defined                          | Netherlands | 90/713 COVID-19-negative                    | Online anonymous questionnaire            | General symptom             |
| Roland (2020) [5]             | Cohort                  | 302       | 88:114                     | 40 (13)                              | USA         | 145/157 COVID-19-negative                   | Anonymous self-reported symptom           | Smell and/or taste disorder |
| Roland (2020) [5]             | Cohort                  | 302       | 88:114                     | 40 (13)                              | USA         | 145/157 COVID-19-negative                   | Anonymous self-reported symptom           | General symptom             |
| Menni (2020) [9]              | Cross-sectional         | 1,702     | 179:400/297:826            | 40.79 (11.84)/41.22 (12.04)          | UK          | 579/1,123 COVID-19-negative                 | Anonymous self-reported symptom           | Smell and/or taste disorder |
| Boudjema (2020) [12]          | Cohort                  | 3,497     | 1,801:1,696                | 42.5 (15.16)                         | France      | 673/2,824 heterogenous (healthy, ill, etc.) | Brief questionnaire                       | Smell and/or taste disorder |
| Wee (2020) [22]               | Cross-sectional         | 870       | Not defined                | Not defined                          | Singapore   | 153/716 COVID-19-negative                   | Self-reported olfactory & taste disorders | Smell and/or taste disorder |
| Moein (2020) [19]             | Case-control            | 120       | 80:40                      | 46.55 ± 12.17/46.55 ± 12.07          | Iran        | 60/60 heterogenous (healthy, ill, etc.)     | UPSIT                                     | Smell and/or taste disorder |
| Clemency (2020) [13]          | Observational           | 961       | Not defined                | Not defined                          | USA         | 225/736 heterogenous (healthy, ill, etc.)   | Standardized checklist                    | Smell and/or taste disorder |
| Clemency (2020) [13]          | Observational           | 961       | Not defined                | Not defined                          | USA         | 225/736 heterogenous (healthy, ill, etc.)   | Standardized checklist                    | General symptom             |
| Jiang (2020) [17]             | Retrospective           | 54        | 35/19                      | 41 (30–55)/34 (25–48)                | China       | 36/18 adenovirus pneumonia                  | Clinical examination                      | General symptom             |
| Just (2020) [11]              | Cross-sectional cohort  | 374       | 154:217                    | 47.0 (20.2)/46.4 (19.7)              | Germany     | 334/40 common cold                          | Self-reported                             | Smell and/or taste disorder |
| Just (2020) [11]              | Cross-sectional cohort  | 374       | 154:217                    | 47.0 (20.2)/46.4 (19.7)              | Germany     | 334/40 common cold                          | Self-reported                             | General symptom             |
| Dixon (2020) [14]             | Community-based cohorts | 8,214     | 3,647:4,566                | Not defined                          | USA         | 368/7,846 heterogenous (healthy, ill, etc.) | Standardized checklist                    | Smell and/or taste disorder |

(Continued to the next page)

Supplementary Table 2. Continued

| Study               | Study design                  | Total no. | Male:female (case/control) | Age (case/control, yr) <sup>a)</sup> | Nation    | Number (COVID-19-positive/control)         | Assessment tool                | Assessed symptom            |
|---------------------|-------------------------------|-----------|----------------------------|--------------------------------------|-----------|--------------------------------------------|--------------------------------|-----------------------------|
| Dixon (2020) [14]   | Community-based cohorts       | 8,214     | 3,647/4,565                | Not defined                          | USA       | 3687,846 heterogenous (healthy, ill, etc.) | Standardized checklist         | General symptom             |
| Sayin (2020) [4]    | Comparative study             | 128       | 48/80                      | 38.63±10.08                          | Turkey    | 64/64 common cold                          | AAO-HNS Anosmia Reporting Tool | Smell and/or taste disorder |
| Sayin (2020) [4]    | Comparative study             | 128       | 48/80                      | 38.63±10.08                          | Turkey    | 64/64 common cold                          | AAO-HNS Anosmia Reporting Tool | General symptom             |
| Joffily (2020) [1]  | Cross-sectional observational | 179       | 55/124                     | Not defined                          | Brazil    | 159/20 common cold                         | AAO-HNS Anosmia Reporting Tool | Smell and/or taste disorder |
| Joffily (2020) [1]  | Cross-sectional observational | 179       | 55/124                     | Not defined                          | Brazil    | 159/20 common cold                         | AAO-HNS Anosmia Reporting Tool | General symptom             |
| Menni (2020) [9]    | Cohort                        | 15,638    | 3,983/11,655               | 41.25 (12.18)/41.87 (12.14)          | UK        | 6,452/9,186 heterogenous (random persons)  | Smartphone-based app           | Smell and/or taste disorder |
| Menni (2020) [9]    | Cohort                        | 15,638    | 3,983/11,655               | 41.25 (12.18)/41.87 (12.14)          | UK        | 6,452/9,186 heterogenous (random persons)  | Smartphone-based app           | General symptom             |
| Menni (2020) [9]    | Cohort                        | 2,763     | 527/2,236                  | 44.65 (14.31)/47.25 (13.80)          | USA       | 726/2,037 heterogenous (random persons)    | Smartphone-based app           | Smell and/or taste disorder |
| Menni (2020) [9]    | Cohort                        | 2,763     | 527/2,236                  | 44.65 (14.31)/47.25 (13.80)          | USA       | 726/2,037 heterogenous (random persons)    | Smartphone-based app           | General symptom             |
| Haehner (2020) [15] | Cross-sectional controlled    | 500       | 225/275                    | 41.3 (18-86)                         | Germany   | 34/466 COVID-19-negative                   | VAS (self-reported)            | Smell and/or taste disorder |
| Feng (2020) [36]    | Cross-sectional               | 132       | 5:2/69:56                  | 39.0 (37.0-41.5)/NR                  | China     | 71/25 suspicious                           | Self-reported symptom data     | General symptom             |
| Ai (2020) [39]      | Cross-sectional               | 53        | 10:10/17:16                | 37 (33.75-50.5)/39 (30.5-43)         | China     | 20/33 pneumonia                            | Self-reported symptom data     | General symptom             |
| Liang (2020) [41]   | Cross-sectional               | 88        | 11:10/67                   | 42.0 (24-65)/NR                      | China     | 21/67 pneumonia                            | Self-reported symptom data     | General symptom             |
| Cheng (2020) [25]   | Cross-sectional               | 33        | 11/22                      | 50.36±15.50/43.59±16.02              | China     | 11/22 pneumonia                            | Self-reported symptom data     | General symptom             |
| Song (2020) [37]    | Cross-sectional               | 304       | 46:27/104:127              | 53.0 (43.5-62.0)/34.0 (29.0-49.0)    | China     | 73/231 heterogenous (healthy, ill, etc.)   | Self-reported symptom data     | General symptom             |
| Peng (2020) [28]    | Cross-sectional               | 86        | 5:6/34:40                  | 40.73±11.32/NR                       | China     | 11/75 suspicious                           | Self-reported symptom data     | General symptom             |
| Zhu (2020) [24]     | Cross-sectional               | 116       | 15:17/41:48                | NR                                   | China     | 32/84 heterogenous (healthy, ill, etc.)    | Self-reported symptom data     | General symptom             |
| Sun (2020) [26]     | Cross-sectional               | 788       | 29:251/351:382             | 34/42                                | Singapore | 54/734 suspicious                          | Self-reported symptom data     | General symptom             |
| Zhao (2020) [23]    | Case-control                  | 34        | 11:8/6:9                   | 48 (27-57)/35 (27-46)                | China     | 19/15 pneumonia                            | Self-reported symptom data     | General symptom             |
| Chen (2020) [30]    | Cross-sectional               | 136       | 41:29/43:23                | 12.93±13.32/46.73±25.00              | China     | 70/66 pneumonia                            | Self-reported symptom data     | General symptom             |

(Continued to the next page)

Supplementary Table 2. Continued

| Study                     | Study design    | Total no. | Male:female (case/control) | Age (case/control, yr) <sup>a)</sup> | Nation | Number (COVID-19-positive/control)    | Assessment tool                       | Assessed symptom            |
|---------------------------|-----------------|-----------|----------------------------|--------------------------------------|--------|---------------------------------------|---------------------------------------|-----------------------------|
| Yang (2020) [46]          | Case-control    | 121       | 41:32/30:18                | 41.92±14.11/40.38±27.31              | China  | 73/48 influenza                       | Self-reported symptom data            | General symptom             |
| Tolia (2020) [27]         | Cross-sectional | 283       | 13:16/120:134              | NR                                   | USA    | 29/254 suspicious                     | Self-reported symptom data            | General symptom             |
| Rentsch (2020) [40]       | Cross-sectional | 3,789     | 27:558/345:2,859           | 66.1 (60.4–71.0)/65.6 (60.5–70.7)    | USA    | 585/3,204 heterogenous                | Extracted from health record database | General symptom             |
| Nobel (2020) [29]         | Case-control    | 516       | 145:133/108:130            | NR                                   | USA    | 278/238 suspicious                    | Self-reported symptom data            | General symptom             |
| Carignan (2020) [32]      | Case-control    | 268       | 70:64/81:53                | 57.1 (41.2–64.5)/57.2 (42.6–64.4)    | Canada | 134/134 heterogenous (random persons) | Standardized checklist                | Smell and/or taste disorder |
| Carignan (2020) [32]      | Case-control    | 268       | 70:64/81:53                | 57.1 (41.2–64.5)/57.2 (42.6–64.4)    | Canada | 134/134 heterogenous (random persons) | Standardized checklist                | General symptom             |
| Rojas-Lechuga (2020) [35] | Cross-sectional | 304       | 72:125/50:57               | 46.5±14.5/50.6±16.6                  | Spain  | 197/107 common cold or flu like       | VAS (self-reported)                   | Smell and/or taste disorder |
| Boscolo-Rizzo (2020) [31] | Cross-sectional | 121       | NR                         | NR                                   | Italy  | 54/67 heterogenous                    | Standardized checklist                | Smell and/or taste disorder |
| Boscolo-Rizzo (2020) [31] | Cross-sectional | 121       | NR                         | NR                                   | Italy  | 54/67 heterogenous                    | Standardized checklist                | General symptom             |
| Chung (2020) [33]         | Cross-sectional | 36        | 7:11/5:13                  | NR                                   | China  | 18/18 health care worker              | Standardized checklist                | Smell and/or taste disorder |

COVID-19, coronavirus disease 2019; AAO-HNS, American Academy of Otolaryngology–Head and Neck Surgery; app, application; VAS, visual analog scale; NR, not reported.

<sup>a)</sup>Values are presented as number (%), mean±standard deviation, or median (range).
